# Supplementary material
Source: Springer Nature journal article supplement (https://www.springermedizin.de/resource/supplementary/13229_2013_160_MOESM2_ESM.pdf/9676214)

A

AA408296

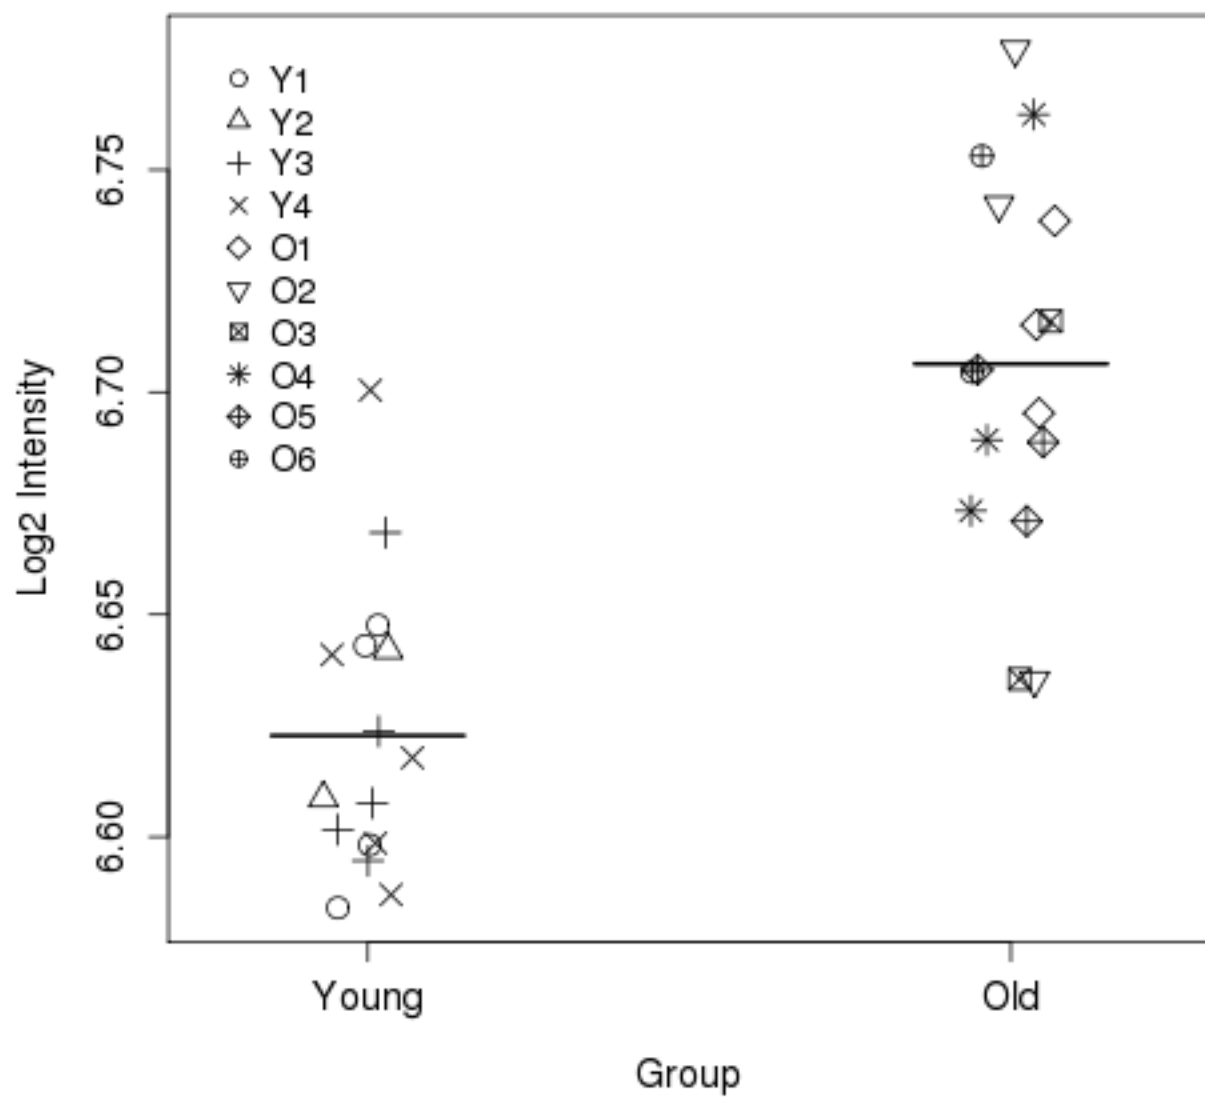

B

### MUC15

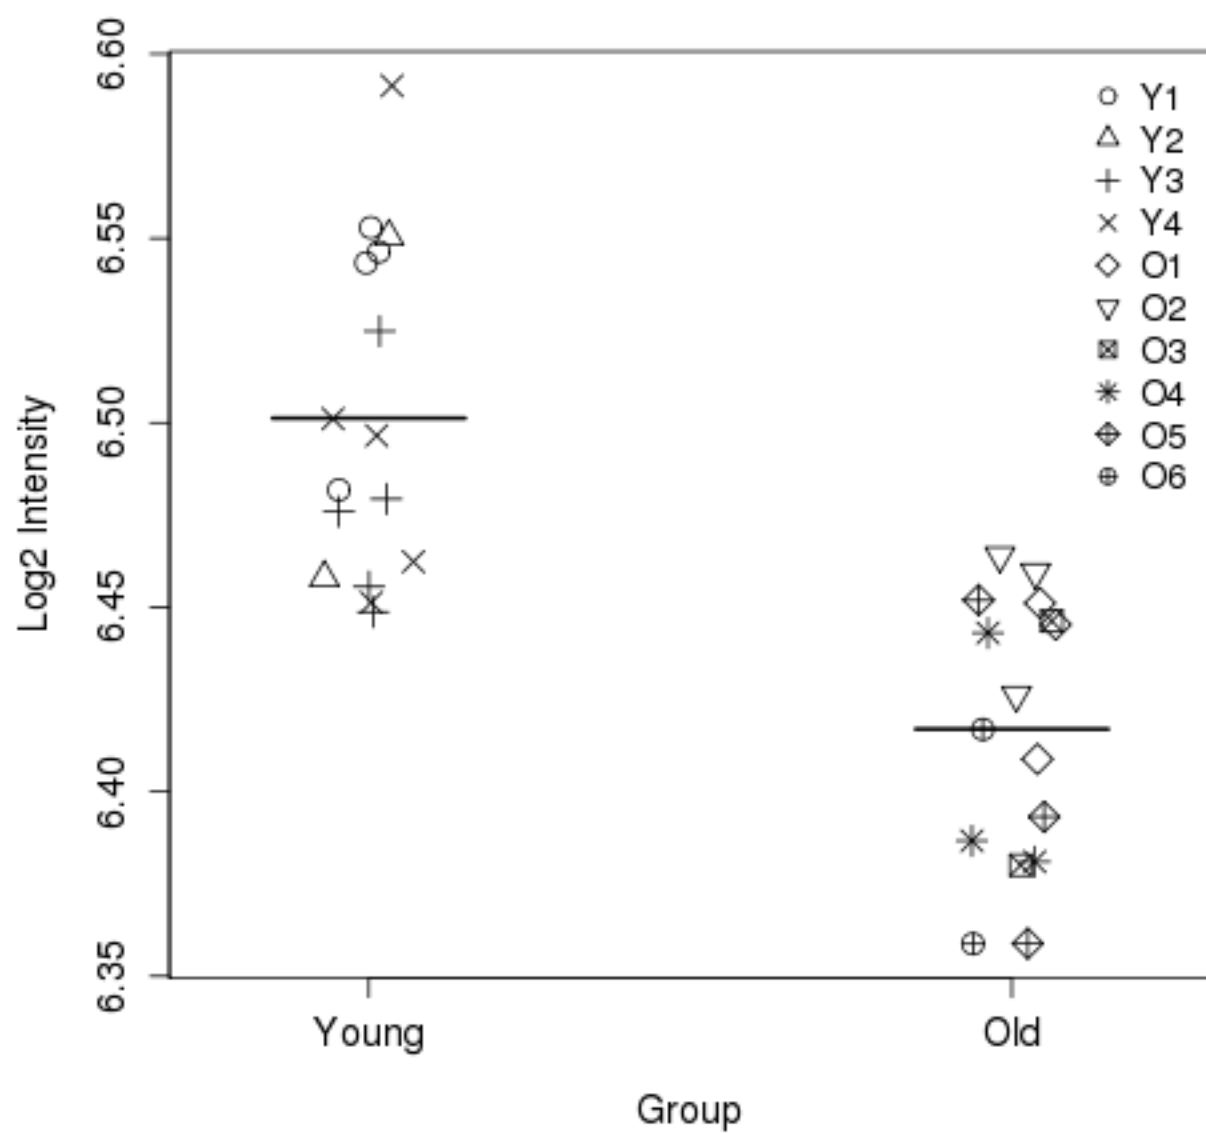

C

### LTA

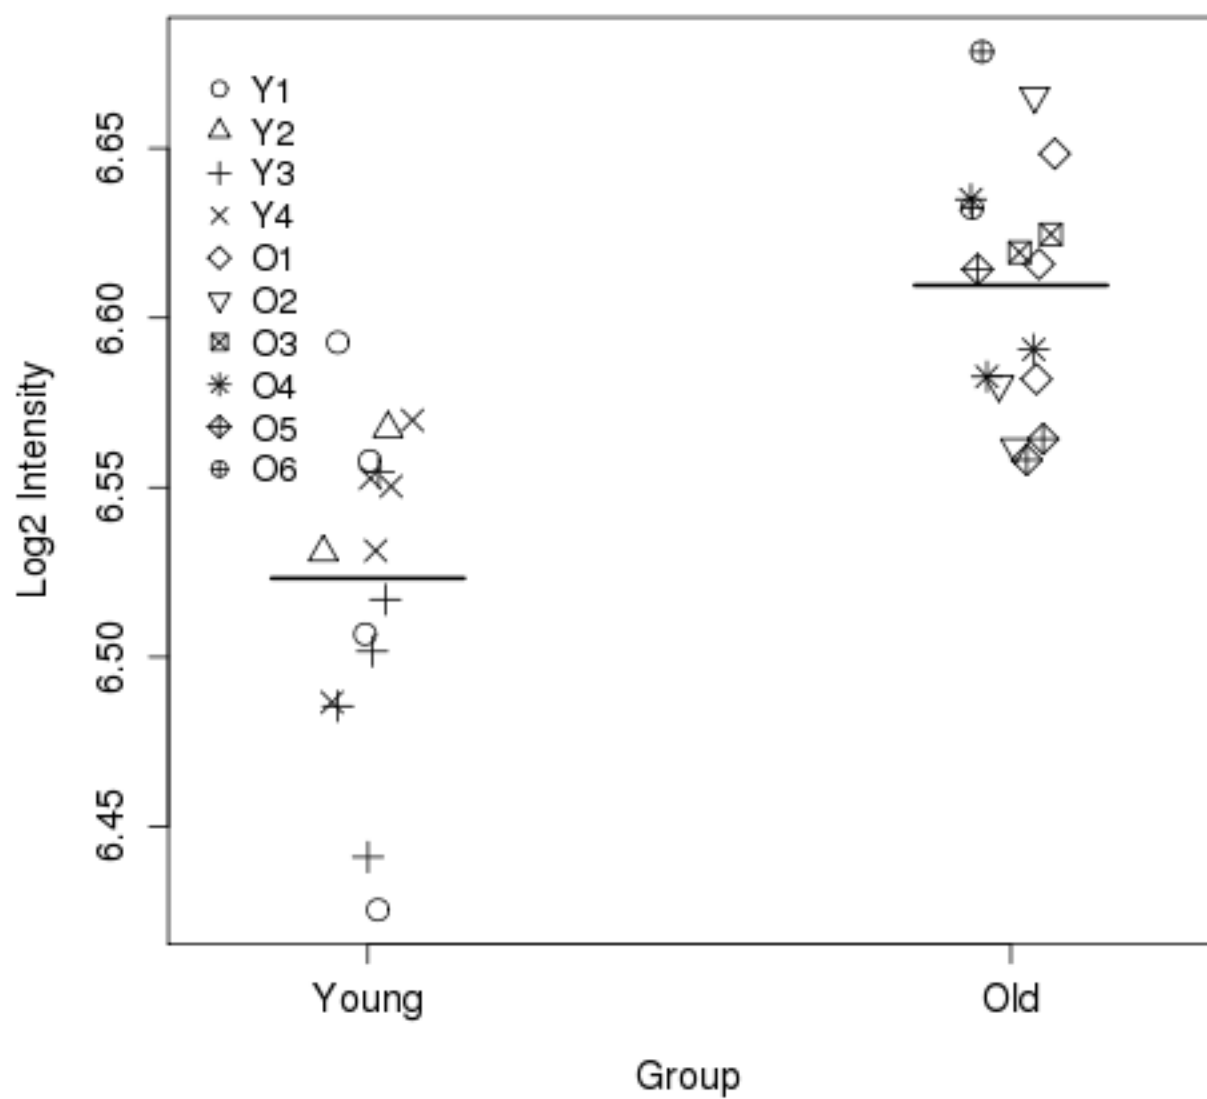

Supplement: MOESM2 [file 9676214]
